# Supplementary material
Source: Springer Nature journal article supplement (https://www.springermedizin.de/resource/supplementary/12943_2009_564_MOESM5_ESM.pdf/9554986)

Placebo (M7)

SAHA treated (M10)

HE (400x)

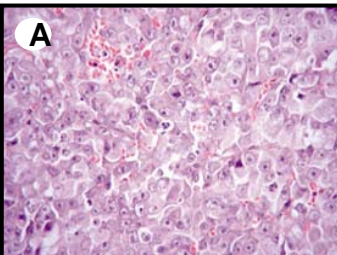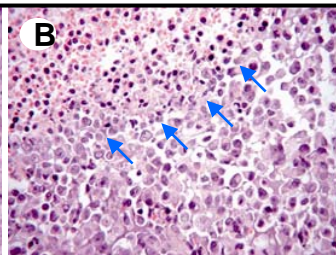

HE (1000x)

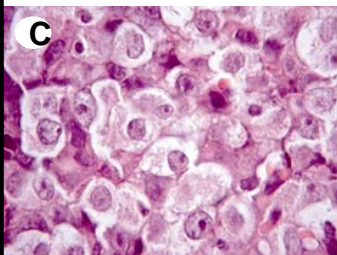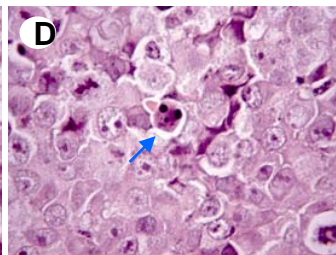

Ki67 (400x)

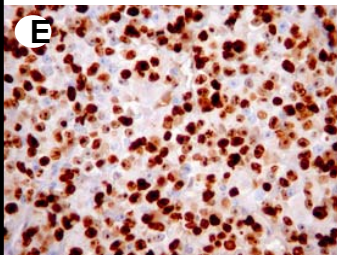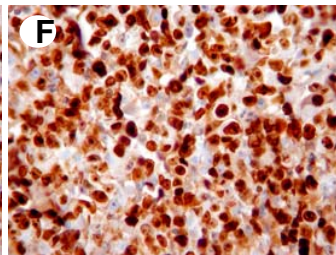

Supplement: MOESM5 [file 9554986]
